# Supplementary material
Source: publisher figshare collection journal article supplement (https://acs.figshare.com/ndownloader/files/5168662)
Supplement: Supplementary file 1 [file 5168662]

 
#  CIF produced by WinGX routine CIF_UPDATE
#  Created on 2002-04-12 at 14:02:03
#  Using CIFtbx version 2.6.2 16 Jun 1998
 
#  Dictionary name : cif_core.dic
#  Dictionary vers : 2.2
#  Request file    : c:\wingx\files\archive.dat
#  CIF files read  : cotmbr import dreduc struct
 
 
data_cotmbr
 
_audit_creation_date            2002-04-12T14:02:03-00:00
_audit_creation_method         'WinGX routine CIF_UPDATE'
_audit_conform_dict_name        cif_core.dic
_audit_conform_dict_version     2.2
_audit_conform_dict_location    ftp://ftp.iucr.org/pub/cif_core.dic
_publ_requested_category        FM
 
#----------------------------------------------------------------------------#
#                   CHEMICAL INFORMATION                                     #
#----------------------------------------------------------------------------#
 
_chemical_name_systematic
;
 ?
;
_chemical_name_common                   'bromo hydrotris(methimazolyl)borato cobalt(II)'
_chemical_formula_moiety                'C12 H16 B1 Br1 Co1 N6 S3'
_chemical_formula_sum                   'C12 H16 B Br Co N6 S3'
_chemical_formula_weight                490.14
_chemical_compound_source               'synthesis as described'
 
#----------------------------------------------------------------------------#
#                   UNIT CELL INFORMATION                                    #
#----------------------------------------------------------------------------#
 
_symmetry_cell_setting                  monoclinic
_symmetry_space_group_name_H-M          P21/n
_symmetry_space_group_name_Hall         '-P 2yn'
_symmetry_Int_Tables_number             14
loop_
    _symmetry_equiv_pos_as_xyz
'x, y, z'
'-x+1/2, y+1/2, -z+1/2'
'-x, -y, -z'
'x-1/2, -y-1/2, z-1/2'
 
_cell_length_a                          12.0655(6)
_cell_length_b                          12.4897(7)
_cell_length_c                          12.7057(7)
_cell_angle_alpha                       90
_cell_angle_beta                        95.714(3)
_cell_angle_gamma                       90
_cell_volume                            1905.17(18)
_cell_formula_units_Z                   4
_cell_measurement_temperature           123(2)
_cell_measurement_reflns_used           32592
_cell_measurement_theta_min             2.91
_cell_measurement_theta_max             27.485
_cell_measurement_wavelength            0.71073
 
#----------------------------------------------------------------------------#
#                   CRYSTAL INFORMATION                                      #
#----------------------------------------------------------------------------#
 
_exptl_crystal_description              prism
_exptl_crystal_colour                   Green
_exptl_crystal_size_max                 0.2
_exptl_crystal_size_mid                 0.2
_exptl_crystal_size_min                 0.2
_exptl_crystal_density_diffrn           1.709
_exptl_crystal_density_method           'not measured'
_exptl_crystal_F_000                    980
_exptl_special_details
;
 ?
;
 
#----------------------------------------------------------------------------#
#                   ABSORPTION CORRECTION                                    #
#----------------------------------------------------------------------------#
 
_exptl_absorpt_coefficient_mu           3.334
_exptl_absorpt_correction_type          none
 
#----------------------------------------------------------------------------#
#                   DATA COLLECTION                                          #
#----------------------------------------------------------------------------#
 
_diffrn_source                          'Enraf Nonius FR590'
_diffrn_ambient_temperature             123(2)
_diffrn_radiation_wavelength            0.71073
_diffrn_radiation_type                  MoK\a
_diffrn_radiation_monochromator         graphite
_diffrn_radiation_probe                 x-ray
_diffrn_detector                        'CCD plate'
_diffrn_orient_matrix_type              'by Nonius Collect from scalepack cell'
_diffrn_orient_matrix_ub_11             0.426014E-1
_diffrn_orient_matrix_ub_12             -0.713915E-1
_diffrn_orient_matrix_ub_13             -0.51387E-2
_diffrn_orient_matrix_ub_21             0.483542E-1
_diffrn_orient_matrix_ub_22             0.246165E-1
_diffrn_orient_matrix_ub_23             0.588766E-1
_diffrn_orient_matrix_ub_31             -0.440843E-1
_diffrn_orient_matrix_ub_32             -0.392829E-1
_diffrn_orient_matrix_ub_33             0.526298E-1
_diffrn_measurement_device              '95mm CCD camera on \k-goniostat'
_diffrn_measurement_device_type         KappaCCD
_diffrn_measurement_method              CCD
_diffrn_reflns_av_R_equivalents         0.0694
_diffrn_reflns_av_unetI/netI            0.0751
_diffrn_reflns_number                   13621
_diffrn_reflns_limit_h_min              -15
_diffrn_reflns_limit_h_max              15
_diffrn_reflns_limit_k_min              -16
_diffrn_reflns_limit_k_max              16
_diffrn_reflns_limit_l_min              -16
_diffrn_reflns_limit_l_max              16
_diffrn_reflns_theta_min                2.95
_diffrn_reflns_theta_max                27.51
_diffrn_reflns_theta_full               27.51
_diffrn_measured_fraction_theta_full
                                        0.962
_diffrn_measured_fraction_theta_max
                                        0.962
_reflns_number_total                    4210
_reflns_number_gt                       2950
_reflns_threshold_expression            >2sigma(I)
 
#----------------------------------------------------------------------------#
#                   COMPUTER PROGRAMS USED                                   #
#----------------------------------------------------------------------------#
 
_computing_data_collection              'Collect (Nonius BV, 1997-2000)'
_computing_cell_refinement
                                       'HKL Scalepack (Otwinowski & Minor 1997)'
_computing_data_reduction
                             'HKL Denzo and Scalepack (Otwinowski & Minor 1997)'
_computing_structure_refinement         'SHELXL-97 (Sheldrick, 1997)'
_computing_molecular_graphics           'Ortep-3 for Windows (Farrugia, 1997)'
_computing_publication_material
                                   'WinGX publication routines (Farrugia, 1999)'
 
#----------------------------------------------------------------------------#
#                   REFINEMENT INFORMATION                                   #
#----------------------------------------------------------------------------#
 
_refine_special_details
;
 Refinement of F^2^ against ALL reflections.  The weighted R-factor wR and
 goodness of fit S are based on F^2^, conventional R-factors R are based
 on F, with F set to zero for negative F^2^. The threshold expression of
 F^2^ > 2sigma(F^2^) is used only for calculating R-factors(gt) etc. and is
 not relevant to the choice of reflections for refinement.  R-factors based
 on F^2^ are statistically about twice as large as those based on F, and R-
 factors based on ALL data will be even larger.
;
_refine_ls_structure_factor_coef        Fsqd
_refine_ls_matrix_type                  full
_refine_ls_weighting_scheme             calc
_refine_ls_weighting_details
         'calc w=1/[\s^2^(Fo^2^)+(0.0488P)^2^+0.0244P] where P=(Fo^2^+2Fc^2^)/3'
_atom_sites_solution_primary            direct
_atom_sites_solution_secondary          difmap
_atom_sites_solution_hydrogens          geom
_refine_ls_hydrogen_treatment           mixed
_refine_ls_extinction_method            none
_refine_ls_number_reflns                4210
_refine_ls_number_parameters            221
_refine_ls_number_restraints            0
_refine_ls_R_factor_all                 0.0828
_refine_ls_R_factor_gt                  0.0462
_refine_ls_wR_factor_ref                0.1066
_refine_ls_wR_factor_gt                 0.0934
_refine_ls_goodness_of_fit_ref          1.023
_refine_ls_restrained_S_all             1.023
_refine_ls_shift/su_max                 0.001
_refine_ls_shift/su_mean                0
_refine_diff_density_max                0.66
_refine_diff_density_min                -0.797
_refine_diff_density_rms                0.117
 
#----------------------------------------------------------------------------#
#                   ATOMIC TYPES, COORDINATES AND THERMAL PARAMETERS         #
#----------------------------------------------------------------------------#
 
loop_
    _atom_type_symbol
    _atom_type_description
    _atom_type_scat_dispersion_real
    _atom_type_scat_dispersion_imag
    _atom_type_scat_source
H H 0 0 'International Tables Vol C Tables 4.2.6.8 and 6.1.1.4'
C C 0.0033 0.0016 'International Tables Vol C Tables 4.2.6.8 and 6.1.1.4'
N N 0.0061 0.0033 'International Tables Vol C Tables 4.2.6.8 and 6.1.1.4'
S S 0.1246 0.1234 'International Tables Vol C Tables 4.2.6.8 and 6.1.1.4'
Co Co 0.3494 0.9721 'International Tables Vol C Tables 4.2.6.8 and 6.1.1.4'
Br Br -0.2901 2.4595 'International Tables Vol C Tables 4.2.6.8 and 6.1.1.4'
B B 0.0013 0.0007 'International Tables Vol C Tables 4.2.6.8 and 6.1.1.4'
 
loop_
    _atom_site_label
    _atom_site_type_symbol
    _atom_site_fract_x
    _atom_site_fract_y
    _atom_site_fract_z
    _atom_site_U_iso_or_equiv
    _atom_site_adp_type
    _atom_site_occupancy
    _atom_site_symmetry_multiplicity
    _atom_site_calc_flag
    _atom_site_refinement_flags
    _atom_site_disorder_assembly
    _atom_site_disorder_group
Br1 Br 0.20978(3) 0.19136(4) 0.27591(3) 0.03201(14) Uani 1 1 d . . .
Co1 Co 0.24653(4) 0.22514(4) 0.46160(4) 0.02285(15) Uani 1 1 d . . .
S1 S 0.43773(8) 0.23181(8) 0.50496(8) 0.0252(2) Uani 1 1 d . . .
S2 S 0.16532(8) 0.38412(8) 0.51100(8) 0.0260(2) Uani 1 1 d . . .
S3 S 0.18352(8) 0.08774(8) 0.56419(8) 0.0287(3) Uani 1 1 d . . .
N3 N 0.3353(2) 0.3801(2) 0.6768(2) 0.0212(7) Uani 1 1 d . . .
N5 N 0.1896(3) 0.2426(3) 0.7222(2) 0.0230(7) Uani 1 1 d . . .
N6 N 0.0228(3) 0.1899(3) 0.6616(2) 0.0268(8) Uani 1 1 d . . .
N2 N 0.5317(3) 0.0954(3) 0.6534(3) 0.0290(8) Uani 1 1 d . . .
N4 N 0.3386(3) 0.5156(3) 0.5685(2) 0.0264(8) Uani 1 1 d . . .
N1 N 0.3979(2) 0.1877(3) 0.7134(2) 0.0226(7) Uani 1 1 d . . .
C5 C 0.2808(3) 0.4273(3) 0.5900(3) 0.0215(8) Uani 1 1 d . . .
C10 C 0.1135(3) 0.2993(3) 0.7746(3) 0.0276(9) Uani 1 1 d . . .
H10 H 0.1306 0.3515 0.8281 0.033 Uiso 1 1 calc R . .
C11 C 0.0109(4) 0.2674(3) 0.7364(3) 0.0315(10) Uani 1 1 d . . .
H11 H -0.0574 0.2936 0.7574 0.038 Uiso 1 1 calc R . .
C9 C 0.1330(3) 0.1751(3) 0.6534(3) 0.0222(9) Uani 1 1 d . . .
C1 C 0.4544(3) 0.1720(3) 0.6280(3) 0.0227(9) Uani 1 1 d . . .
C8 C 0.3087(4) 0.5899(4) 0.4807(3) 0.0381(11) Uani 1 1 d . . .
H8A H 0.3638 0.6476 0.4824 0.057 Uiso 1 1 calc R . .
H8B H 0.2349 0.6203 0.4877 0.057 Uiso 1 1 calc R . .
H8C H 0.3073 0.5513 0.4134 0.057 Uiso 1 1 calc R . .
C3 C 0.5241(3) 0.0614(3) 0.7547(3) 0.0315(10) Uani 1 1 d . . .
H3 H 0.5689 0.0083 0.7918 0.038 Uiso 1 1 calc R . .
B1 B 0.3140(4) 0.2763(4) 0.7389(4) 0.0253(10) Uani 1 1 d . . .
C7 C 0.4314(3) 0.5247(3) 0.6408(3) 0.0291(9) Uani 1 1 d . . .
H7 H 0.4863 0.5795 0.6431 0.035 Uiso 1 1 calc R . .
C6 C 0.4292(3) 0.4413(3) 0.7072(3) 0.0255(9) Uani 1 1 d . . .
H6 H 0.4829 0.4266 0.7653 0.031 Uiso 1 1 calc R . .
C12 C -0.0678(3) 0.1354(4) 0.6000(4) 0.0390(11) Uani 1 1 d . . .
H12A H -0.139 0.1606 0.6216 0.058 Uiso 1 1 calc R . .
H12B H -0.0611 0.0581 0.612 0.058 Uiso 1 1 calc R . .
H12C H -0.0644 0.1507 0.5247 0.058 Uiso 1 1 calc R . .
C2 C 0.4413(3) 0.1171(3) 0.7919(3) 0.0307(10) Uani 1 1 d . . .
H2 H 0.4165 0.1097 0.8602 0.037 Uiso 1 1 calc R . .
C4 C 0.6189(3) 0.0639(4) 0.5869(4) 0.0390(11) Uani 1 1 d . . .
H4A H 0.6646 0.007 0.6222 0.058 Uiso 1 1 calc R . .
H4B H 0.6661 0.1258 0.5754 0.058 Uiso 1 1 calc R . .
H4C H 0.5844 0.0377 0.5186 0.058 Uiso 1 1 calc R . .
H1 H 0.325(3) 0.295(3) 0.823(3) 0.017(9) Uiso 1 1 d . . .
 
loop_
    _atom_site_aniso_label
    _atom_site_aniso_U_11
    _atom_site_aniso_U_22
    _atom_site_aniso_U_33
    _atom_site_aniso_U_23
    _atom_site_aniso_U_13
    _atom_site_aniso_U_12
Br1 0.0289(2) 0.0442(3) 0.0224(2) -0.00774(19) 0.00036(17) 0.00114(19)
Co1 0.0232(3) 0.0247(3) 0.0209(3) -0.0037(2) 0.0032(2) -0.0025(2)
S1 0.0226(5) 0.0277(6) 0.0259(5) 0.0009(4) 0.0048(4) -0.0021(4)
S2 0.0264(5) 0.0235(6) 0.0272(5) -0.0003(4) -0.0024(4) 0.0001(4)
S3 0.0339(6) 0.0226(6) 0.0310(6) -0.0057(4) 0.0104(5) -0.0065(4)
N3 0.0230(17) 0.0186(18) 0.0226(16) -0.0026(13) 0.0045(14) -0.0009(14)
N5 0.0267(18) 0.0246(19) 0.0185(16) -0.0001(14) 0.0061(14) -0.0015(14)
N6 0.0272(18) 0.027(2) 0.0267(18) 0.0033(15) 0.0068(15) -0.0038(15)
N2 0.0263(18) 0.023(2) 0.037(2) -0.0046(16) -0.0020(15) -0.0008(15)
N4 0.0325(19) 0.0205(19) 0.0259(17) 0.0044(14) 0.0018(15) -0.0008(15)
N1 0.0254(17) 0.0196(18) 0.0218(17) -0.0004(14) -0.0023(14) -0.0028(14)
C5 0.025(2) 0.017(2) 0.024(2) -0.0022(16) 0.0053(16) -0.0005(17)
C10 0.030(2) 0.024(2) 0.030(2) -0.0002(18) 0.0111(18) 0.0024(18)
C11 0.033(2) 0.028(2) 0.036(2) 0.0013(19) 0.016(2) 0.0030(19)
C9 0.024(2) 0.020(2) 0.023(2) 0.0058(16) 0.0069(17) -0.0042(16)
C1 0.0200(19) 0.018(2) 0.030(2) -0.0015(17) 0.0002(17) -0.0023(16)
C8 0.042(3) 0.031(3) 0.041(3) 0.012(2) -0.003(2) -0.007(2)
C3 0.036(2) 0.020(2) 0.036(2) 0.0052(18) -0.0088(19) 0.0012(19)
B1 0.032(3) 0.019(3) 0.025(2) -0.0015(19) 0.002(2) -0.003(2)
C7 0.028(2) 0.026(2) 0.033(2) -0.0049(19) 0.0014(18) -0.0048(18)
C6 0.023(2) 0.024(2) 0.028(2) -0.0047(18) -0.0026(17) -0.0039(17)
C12 0.027(2) 0.041(3) 0.048(3) 0.005(2) -0.002(2) -0.004(2)
C2 0.038(2) 0.024(2) 0.029(2) 0.0066(18) -0.0043(19) -0.0051(19)
C4 0.027(2) 0.035(3) 0.053(3) -0.012(2) -0.004(2) 0.002(2)
 
 
#----------------------------------------------------------------------------#
#                   MOLECULAR GEOMETRY                                       #
#----------------------------------------------------------------------------#
 
_geom_special_details
;
 All esds (except the esd in the dihedral angle between two l.s. planes)
 are estimated using the full covariance matrix.  The cell esds are taken
 into account individually in the estimation of esds in distances, angles
 and torsion angles; correlations between esds in cell parameters are only
 used when they are defined by crystal symmetry.  An approximate (isotropic)
 treatment of cell esds is used for estimating esds involving l.s. planes.
;
loop_
    _geom_bond_atom_site_label_1
    _geom_bond_atom_site_label_2
    _geom_bond_distance
    _geom_bond_site_symmetry_2
    _geom_bond_publ_flag
Br1 Co1 2.3943(6) . ?
Co1 S1 2.3193(11) . ?
Co1 S2 2.3279(12) . ?
Co1 S3 2.3280(11) . ?
S1 C1 1.727(4) . ?
S2 C5 1.721(4) . ?
S3 C9 1.727(4) . ?
N3 C5 1.361(5) . ?
N3 C6 1.390(5) . ?
N3 B1 1.552(5) . ?
N5 C9 1.350(5) . ?
N5 C10 1.382(5) . ?
N5 B1 1.553(5) . ?
N6 C9 1.357(5) . ?
N6 C11 1.374(5) . ?
N6 C12 1.449(5) . ?
N2 C1 1.351(5) . ?
N2 C3 1.368(5) . ?
N2 C4 1.469(5) . ?
N4 C5 1.348(5) . ?
N4 C7 1.381(5) . ?
N4 C8 1.468(5) . ?
N1 C1 1.352(5) . ?
N1 C2 1.394(5) . ?
N1 B1 1.555(6) . ?
C10 C11 1.344(6) . ?
C3 C2 1.341(6) . ?
C7 C6 1.343(5) . ?
 
loop_
    _geom_angle_atom_site_label_1
    _geom_angle_atom_site_label_2
    _geom_angle_atom_site_label_3
    _geom_angle
    _geom_angle_site_symmetry_1
    _geom_angle_site_symmetry_3
    _geom_angle_publ_flag
S1 Co1 S2 109.92(4) . . ?
S1 Co1 S3 105.43(4) . . ?
S2 Co1 S3 107.94(4) . . ?
S1 Co1 Br1 108.82(3) . . ?
S2 Co1 Br1 111.99(3) . . ?
S3 Co1 Br1 112.53(3) . . ?
C1 S1 Co1 102.90(13) . . ?
C5 S2 Co1 94.96(13) . . ?
C9 S3 Co1 93.31(13) . . ?
C5 N3 C6 107.6(3) . . ?
C5 N3 B1 133.1(3) . . ?
C6 N3 B1 119.3(3) . . ?
C9 N5 C10 108.3(3) . . ?
C9 N5 B1 132.6(3) . . ?
C10 N5 B1 118.4(3) . . ?
C9 N6 C11 108.6(3) . . ?
C9 N6 C12 125.9(3) . . ?
C11 N6 C12 125.4(3) . . ?
C1 N2 C3 109.6(3) . . ?
C1 N2 C4 124.7(3) . . ?
C3 N2 C4 125.3(4) . . ?
C5 N4 C7 109.5(3) . . ?
C5 N4 C8 125.3(3) . . ?
C7 N4 C8 125.1(3) . . ?
C1 N1 C2 107.3(3) . . ?
C1 N1 B1 131.4(3) . . ?
C2 N1 B1 120.5(3) . . ?
N4 C5 N3 107.5(3) . . ?
N4 C5 S2 122.9(3) . . ?
N3 C5 S2 129.4(3) . . ?
C11 C10 N5 107.9(4) . . ?
C10 C11 N6 107.6(3) . . ?
N5 C9 N6 107.6(3) . . ?
N5 C9 S3 129.1(3) . . ?
N6 C9 S3 123.3(3) . . ?
N2 C1 N1 107.6(3) . . ?
N2 C1 S1 122.5(3) . . ?
N1 C1 S1 129.8(3) . . ?
C2 C3 N2 107.0(4) . . ?
N5 B1 N3 111.3(3) . . ?
N5 B1 N1 114.7(3) . . ?
N3 B1 N1 110.2(3) . . ?
C6 C7 N4 106.8(3) . . ?
C7 C6 N3 108.6(3) . . ?
C3 C2 N1 108.5(3) . . ?

#----END

#  CIF produced by WinGX routine CIF_UPDATE
#  Created on 2003-10-24 at 11:40:08
#  Using CIFtbx version 2.6.2 16 Jun 1998
 
#  Dictionary name : cif_core.dic
#  Dictionary vers : 2.2
#  Request file    : c:\wingx\files\archive.dat
#  CIF files read  : cotm2bf4 import dreduc struct
 
 
data_cotm2bf4
 
_audit_creation_date            2003-10-24T11:40:08-00:00
_audit_creation_method         'WinGX routine CIF_UPDATE'
_audit_conform_dict_name        cif_core.dic
_audit_conform_dict_version     2.2
_audit_conform_dict_location    ftp://ftp.iucr.org/pub/cif_core.dic
_publ_requested_category        FM
 
#----------------------------------------------------------------------------#
#                   CHEMICAL INFORMATION                                     #
#----------------------------------------------------------------------------#
 
_chemical_name_systematic
;
 ?
;
_chemical_name_common                   [Co(Tm)2]BF4. 0.5H2O . 0.25THF
_chemical_formula_moiety                'C24 H32 B3 Co1 F4 N12 S6'
_chemical_formula_sum                   'C25 H35 B3 Co1 F4 N12 O0.75 S6'
_chemical_formula_weight                875.37
_chemical_compound_source               'synthesis as described'
 
#----------------------------------------------------------------------------#
#                   UNIT CELL INFORMATION                                    #
#----------------------------------------------------------------------------#
 
_symmetry_cell_setting                  monoclinic
_symmetry_space_group_name_H-M          C2/c
_symmetry_space_group_name_Hall         '-C 2yc'
_symmetry_Int_Tables_number             15
loop_
    _symmetry_equiv_pos_as_xyz
'x, y, z'
'-x, y, -z+1/2'
'x+1/2, y+1/2, z'
'-x+1/2, y+1/2, -z+1/2'
'-x, -y, -z'
'x, -y, z-1/2'
'-x+1/2, -y+1/2, -z'
'x+1/2, -y+1/2, z-1/2'
 
_cell_length_a                          34.0403(7)
_cell_length_b                          12.8344(3)
_cell_length_c                          19.2489(5)
_cell_angle_alpha                       90
_cell_angle_beta                        101.5400(10)
_cell_angle_gamma                       90
_cell_volume                            8239.6(3)
_cell_formula_units_Z                   8
_cell_measurement_temperature           123(2)
_cell_measurement_reflns_used           9358
_cell_measurement_theta_min             3.395
_cell_measurement_theta_max             27.485
_cell_measurement_wavelength            0.71073
 
#----------------------------------------------------------------------------#
#                   CRYSTAL INFORMATION                                      #
#----------------------------------------------------------------------------#
 
_exptl_crystal_description              needle
_exptl_crystal_colour                   red
_exptl_crystal_size_max                 0.40
_exptl_crystal_size_mid                 0.15
_exptl_crystal_size_min                 0.04
_exptl_crystal_density_diffrn           1.411
_exptl_crystal_density_method           'not measured'
_exptl_crystal_F_000                    3472
_exptl_special_details
;
 ?
;
 
#----------------------------------------------------------------------------#
#                   ABSORPTION CORRECTION                                    #
#----------------------------------------------------------------------------#
 
_exptl_absorpt_coefficient_mu           0.773
_exptl_absorpt_correction_type          none
 
#----------------------------------------------------------------------------#
#                   DATA COLLECTION                                          #
#----------------------------------------------------------------------------#
 
_diffrn_source                          'Enraf Nonius FR590'
_diffrn_ambient_temperature             123(2)
_diffrn_radiation_wavelength            0.71073
_diffrn_radiation_type                  MoK\a
_diffrn_radiation_monochromator         graphite
_diffrn_radiation_probe                 x-ray
_diffrn_detector                        'CCD plate'
_diffrn_orient_matrix_type              'by Nonius Collect from scalepack cell'
_diffrn_orient_matrix_ub_11             -0.0048534
_diffrn_orient_matrix_ub_12             0.0724399
_diffrn_orient_matrix_ub_13             0.0154671
_diffrn_orient_matrix_ub_21             0.0290394
_diffrn_orient_matrix_ub_22             0.016667
_diffrn_orient_matrix_ub_23             0.0036614
_diffrn_orient_matrix_ub_31             -0.0056695
_diffrn_orient_matrix_ub_32             0.0233562
_diffrn_orient_matrix_ub_33             -0.0505845
_diffrn_measurement_device              '95mm CCD camera on \k-goniostat'
_diffrn_measurement_device_type         KappaCCD
_diffrn_measurement_method              'CCD; rotation images; thick slices'
_diffrn_reflns_av_R_equivalents         0.0359
_diffrn_reflns_av_unetI/netI            0.0631
_diffrn_reflns_number                   17044
_diffrn_reflns_limit_h_min              -43
_diffrn_reflns_limit_h_max              44
_diffrn_reflns_limit_k_min              -16
_diffrn_reflns_limit_k_max              16
_diffrn_reflns_limit_l_min              -24
_diffrn_reflns_limit_l_max              24
_diffrn_reflns_theta_min                3.4
_diffrn_reflns_theta_max                27.5
_diffrn_reflns_theta_full               27.5
_diffrn_measured_fraction_theta_full
                                        0.996
_diffrn_measured_fraction_theta_max
                                        0.996
_reflns_number_total                    9437
_reflns_number_gt                       6799
_reflns_threshold_expression            >2sigma(I)
 
#----------------------------------------------------------------------------#
#                   COMPUTER PROGRAMS USED                                   #
#----------------------------------------------------------------------------#
 
_computing_data_collection              'Collect (Nonius BV, 1997-2000)'
_computing_cell_refinement
                                       'HKL Scalepack (Otwinowski & Minor 1997)'
_computing_data_reduction
                             'HKL Denzo and Scalepack (Otwinowski & Minor 1997)'
_computing_structure_solution           'SHELXS-97 (Sheldrick, 1997)'
_computing_structure_refinement         'SHELXL-97 (Sheldrick, 1997)'
_computing_molecular_graphics           'Ortep-3 for Windows (Farrugia, 1997)'
_computing_publication_material
                                   'WinGX publication routines (Farrugia, 1999)'
 
#----------------------------------------------------------------------------#
#                   REFINEMENT INFORMATION                                   #
#----------------------------------------------------------------------------#
 
_refine_special_details
;
 Refinement of F^2^ against ALL reflections.  The weighted R-factor wR and
 goodness of fit S are based on F^2^, conventional R-factors R are based
 on F, with F set to zero for negative F^2^. The threshold expression of
 F^2^ > 2sigma(F^2^) is used only for calculating R-factors(gt) etc. and is
 not relevant to the choice of reflections for refinement.  R-factors based
 on F^2^ are statistically about twice as large as those based on F, and R-
 factors based on ALL data will be even larger.
;
_refine_ls_structure_factor_coef        Fsqd
_refine_ls_matrix_type                  full
_refine_ls_weighting_scheme             calc
_refine_ls_weighting_details
        'calc w=1/[\s^2^(Fo^2^)+(0.0708P)^2^+36.0408P] where P=(Fo^2^+2Fc^2^)/3'
_atom_sites_solution_primary            direct
_atom_sites_solution_secondary          difmap
_atom_sites_solution_hydrogens          geom
_refine_ls_hydrogen_treatment           mixed
_refine_ls_extinction_method            none
_refine_ls_number_reflns                9437
_refine_ls_number_parameters            495
_refine_ls_number_restraints            0
_refine_ls_R_factor_all                 0.0860
_refine_ls_R_factor_gt                  0.0559
_refine_ls_wR_factor_ref                0.1643
_refine_ls_wR_factor_gt                 0.1488
_refine_ls_goodness_of_fit_ref          1.038
_refine_ls_restrained_S_all             1.038
_refine_ls_shift/su_max                 0.393
_refine_ls_shift/su_mean                0.006
_refine_diff_density_max                1.257
_refine_diff_density_min                -0.632
_refine_diff_density_rms                0.103
 
#----------------------------------------------------------------------------#
#                   ATOMIC TYPES, COORDINATES AND THERMAL PARAMETERS         #
#----------------------------------------------------------------------------#
 
loop_
    _atom_type_symbol
    _atom_type_description
    _atom_type_scat_dispersion_real
    _atom_type_scat_dispersion_imag
    _atom_type_scat_source
C C 0.0033 0.0016 'International Tables Vol C Tables 4.2.6.8 and 6.1.1.4'
H H 0 0 'International Tables Vol C Tables 4.2.6.8 and 6.1.1.4'
B B 0.0013 0.0007 'International Tables Vol C Tables 4.2.6.8 and 6.1.1.4'
Co Co 0.3494 0.9721 'International Tables Vol C Tables 4.2.6.8 and 6.1.1.4'
F F 0.0171 0.0103 'International Tables Vol C Tables 4.2.6.8 and 6.1.1.4'
N N 0.0061 0.0033 'International Tables Vol C Tables 4.2.6.8 and 6.1.1.4'
S S 0.1246 0.1234 'International Tables Vol C Tables 4.2.6.8 and 6.1.1.4'
Cl Cl 0.1484 0.1585 'International Tables Vol C Tables 4.2.6.8 and 6.1.1.4'
O O 0.0106 0.006 'International Tables Vol C Tables 4.2.6.8 and 6.1.1.4'
 
loop_
    _atom_site_label
    _atom_site_type_symbol
    _atom_site_fract_x
    _atom_site_fract_y
    _atom_site_fract_z
    _atom_site_U_iso_or_equiv
    _atom_site_adp_type
    _atom_site_occupancy
    _atom_site_symmetry_multiplicity
    _atom_site_calc_flag
    _atom_site_refinement_flags
    _atom_site_disorder_assembly
    _atom_site_disorder_group
F1 F 0.13162(9) 0.0448(3) 0.24472(15) 0.0596(8) Uani 1 1 d . . .
F2 F 0.10818(12) 0.0062(3) 0.13045(16) 0.0707(10) Uani 1 1 d . . .
B3 B 0.09787(18) 0.0405(4) 0.1928(3) 0.0412(12) Uani 1 1 d . . .
F4 F 0.08066(10) 0.1375(2) 0.18100(18) 0.0659(9) Uani 1 1 d . . .
F3 F 0.07121(10) -0.0309(3) 0.21201(19) 0.0701(9) Uani 1 1 d . . .
O1 O 0 0.7597(9) 0.75 0.063(3) Uiso 0.5 2 d SP . .
O3 O 0.3788(3) 0.5470(8) 0.0021(5) 0.087(3) Uiso 0.5 1 d P . .
C29 C 0.3687(3) 0.4463(9) 0.0009(5) 0.051(2) Uiso 0.5 1 d P . .
O2 O 0.0370(4) 0.9218(11) 0.9403(7) 0.046(3) Uiso 0.25 1 d P . .
C27 C 0.0020(7) 1.0667(19) 0.9788(13) 0.058(6) Uiso 0.25 1 d P . .
C28 C 0.0115(7) 0.9492(18) 0.9959(13) 0.054(5) Uiso 0.25 1 d P . .
C26 C 0.0204(6) 1.0958(16) 0.9213(11) 0.047(5) Uiso 0.25 1 d P . .
C25 C 0.0285(8) 0.978(2) 0.8703(13) 0.067(6) Uiso 0.25 1 d P . .
H13 H 0.0436(11) 0.370(3) 0.783(2) 0.023(10) Uiso 1 1 d . . .
H1 H 0.2508(11) 0.588(3) 1.237(2) 0.024(10) Uiso 1 1 d . . .
Co1 Co 0.147475(13) 0.48578(4) 1.00818(2) 0.01339(13) Uani 1 1 d . . .
S1 S 0.12738(3) 0.52096(8) 1.11444(5) 0.0266(2) Uani 1 1 d . . .
S2 S 0.18620(3) 0.63556(8) 1.01087(5) 0.0279(2) Uani 1 1 d . . .
S5 S 0.11066(3) 0.33427(8) 1.00737(5) 0.0275(2) Uani 1 1 d . . .
S3 S 0.20157(3) 0.38110(8) 1.05611(5) 0.0279(2) Uani 1 1 d . . .
S6 S 0.09365(3) 0.59041(8) 0.96147(5) 0.0270(2) Uani 1 1 d . . .
S4 S 0.16684(3) 0.45368(8) 0.90174(5) 0.0279(2) Uani 1 1 d . . .
N7 N 0.10404(10) 0.3244(3) 0.84035(16) 0.0288(7) Uani 1 1 d . . .
N3 N 0.24854(9) 0.5829(3) 1.12239(16) 0.0273(7) Uani 1 1 d . . .
N5 N 0.21351(10) 0.4568(3) 1.19375(16) 0.0293(7) Uani 1 1 d . . .
N4 N 0.26607(10) 0.5961(3) 1.01994(18) 0.0321(8) Uani 1 1 d . . .
N8 N 0.16187(10) 0.2469(3) 0.86735(18) 0.0339(8) Uani 1 1 d . . .
N1 N 0.19074(10) 0.6464(3) 1.17782(16) 0.0285(7) Uani 1 1 d . . .
N10 N 0.03074(9) 0.3608(3) 1.00143(17) 0.0289(7) Uani 1 1 d . . .
N9 N 0.04666(9) 0.3851(3) 0.89840(16) 0.0254(7) Uani 1 1 d . . .
N6 N 0.19222(11) 0.2950(3) 1.18094(19) 0.0381(9) Uani 1 1 d . . .
N11 N 0.07851(10) 0.5130(3) 0.82371(16) 0.0279(7) Uani 1 1 d . . .
N2 N 0.13350(9) 0.7269(3) 1.15155(17) 0.0301(8) Uani 1 1 d . . .
C21 C 0.08920(11) 0.5912(3) 0.8705(2) 0.0278(9) Uani 1 1 d . . .
N12 N 0.09604(11) 0.6765(3) 0.83363(18) 0.0367(9) Uani 1 1 d . . .
C1 C 0.15145(11) 0.6337(3) 1.14878(19) 0.0269(8) Uani 1 1 d . . .
C13 C 0.14329(11) 0.3393(3) 0.8691(2) 0.0284(9) Uani 1 1 d . . .
C2 C 0.19690(13) 0.7502(3) 1.1977(2) 0.0344(10) Uani 1 1 d . . .
H2 H 0.2213 0.78 1.2185 0.041 Uiso 1 1 calc R . .
C9 C 0.20305(11) 0.3795(3) 1.1458(2) 0.0288(9) Uani 1 1 d . . .
C4 C 0.09084(12) 0.7488(4) 1.1260(3) 0.0406(11) Uani 1 1 d . . .
H4A H 0.0841 0.7385 1.0756 0.061 Uiso 1 1 calc R . .
H4B H 0.0853 0.8197 1.1369 0.061 Uiso 1 1 calc R . .
H4C H 0.0751 0.7027 1.1487 0.061 Uiso 1 1 calc R . .
C18 C 0.00593(11) 0.4009(3) 0.8912(2) 0.0318(9) Uani 1 1 d . . .
H18 H -0.0116 0.4189 0.8494 0.038 Uiso 1 1 calc R . .
C6 C 0.28940(11) 0.5636(3) 1.1318(2) 0.0308(9) Uani 1 1 d . . .
H6 H 0.3065 0.5484 1.1746 0.037 Uiso 1 1 calc R . .
C14 C 0.09863(13) 0.2205(3) 0.8220(2) 0.0355(10) Uani 1 1 d . . .
H14 H 0.0744 0.1893 0.8016 0.043 Uiso 1 1 calc R . .
C10 C 0.20765(13) 0.4205(4) 1.2590(2) 0.0397(11) Uani 1 1 d . . .
H10 H 0.2119 0.4585 1.301 0.048 Uiso 1 1 calc R . .
C3 C 0.16143(13) 0.8001(4) 1.1818(2) 0.0378(10) Uani 1 1 d . . .
H3 H 0.1567 0.8701 1.1897 0.045 Uiso 1 1 calc R . .
B2 B 0.06752(14) 0.3987(4) 0.8340(2) 0.0287(10) Uani 1 1 d . . .
C22 C 0.08038(13) 0.5508(4) 0.7571(2) 0.0372(10) Uani 1 1 d . . .
H22 H 0.0752 0.5125 0.7152 0.045 Uiso 1 1 calc R . .
C17 C 0.06163(11) 0.3615(3) 0.96697(19) 0.0252(8) Uani 1 1 d . . .
C23 C 0.09078(15) 0.6508(4) 0.7628(2) 0.0451(12) Uani 1 1 d . . .
H23 H 0.0939 0.695 0.726 0.054 Uiso 1 1 calc R . .
C8 C 0.26454(14) 0.6084(4) 0.9440(2) 0.0392(11) Uani 1 1 d . . .
H8A H 0.2871 0.649 0.9368 0.059 Uiso 1 1 calc R . .
H8B H 0.2401 0.6431 0.9226 0.059 Uiso 1 1 calc R . .
H8C H 0.2654 0.541 0.9226 0.059 Uiso 1 1 calc R . .
C16 C 0.20435(13) 0.2278(4) 0.8938(3) 0.0443(12) Uani 1 1 d . . .
H16A H 0.2198 0.2705 0.8684 0.066 Uiso 1 1 calc R . .
H16B H 0.2102 0.1557 0.8871 0.066 Uiso 1 1 calc R . .
H16C H 0.2111 0.2444 0.9434 0.066 Uiso 1 1 calc R . .
C7 C 0.29993(12) 0.5708(3) 1.0681(2) 0.0332(9) Uani 1 1 d . . .
H7 H 0.3254 0.5606 1.0588 0.04 Uiso 1 1 calc R . .
B1 B 0.22662(13) 0.5701(4) 1.1848(2) 0.0289(10) Uani 1 1 d . . .
C20 C 0.03337(13) 0.3355(4) 1.0761(2) 0.0365(10) Uani 1 1 d . . .
H20A H 0.042 0.2645 1.0845 0.055 Uiso 1 1 calc R . .
H20B H 0.0075 0.3443 1.0881 0.055 Uiso 1 1 calc R . .
H20C H 0.0524 0.381 1.1048 0.055 Uiso 1 1 calc R . .
C11 C 0.19480(13) 0.3212(4) 1.2513(2) 0.0454(12) Uani 1 1 d . . .
H11 H 0.1888 0.2783 1.2866 0.054 Uiso 1 1 calc R . .
C19 C -0.00417(12) 0.3861(4) 0.9544(2) 0.0347(10) Uani 1 1 d . . .
H19 H -0.0297 0.3919 0.9646 0.042 Uiso 1 1 calc R . .
C15 C 0.13433(13) 0.1724(4) 0.8386(2) 0.0400(11) Uani 1 1 d . . .
H15 H 0.1394 0.1023 0.8319 0.048 Uiso 1 1 calc R . .
C5 C 0.23421(11) 0.6032(3) 1.0529(2) 0.0275(8) Uani 1 1 d . . .
C24 C 0.10755(17) 0.7784(4) 0.8645(3) 0.0518(13) Uani 1 1 d . . .
H24A H 0.0862 0.806 0.8849 0.078 Uiso 1 1 calc R . .
H24B H 0.1127 0.8248 0.8282 0.078 Uiso 1 1 calc R . .
H24C H 0.1313 0.7717 0.9006 0.078 Uiso 1 1 calc R . .
C12 C 0.17876(15) 0.1949(4) 1.1486(3) 0.0527(13) Uani 1 1 d . . .
H12A H 0.152 0.2019 1.1212 0.079 Uiso 1 1 calc R . .
H12B H 0.179 0.1438 1.1851 0.079 Uiso 1 1 calc R . .
H12C H 0.1964 0.1732 1.1182 0.079 Uiso 1 1 calc R . .
 
loop_
    _atom_site_aniso_label
    _atom_site_aniso_U_11
    _atom_site_aniso_U_22
    _atom_site_aniso_U_33
    _atom_site_aniso_U_23
    _atom_site_aniso_U_13
    _atom_site_aniso_U_12
F1 0.0595(19) 0.064(2) 0.0464(16) 0.0108(15) -0.0111(14) -0.0034(16)
F2 0.107(3) 0.058(2) 0.0488(18) -0.0073(15) 0.0192(18) 0.0040(19)
B3 0.055(3) 0.030(3) 0.037(3) 0.002(2) 0.004(2) 0.002(2)
F4 0.079(2) 0.0366(17) 0.077(2) 0.0039(15) 0.0021(18) 0.0166(15)
F3 0.068(2) 0.056(2) 0.089(2) 0.0106(18) 0.0202(19) -0.0056(17)
Co1 0.0112(2) 0.0190(3) 0.0095(2) -0.00022(17) 0.00099(16) -0.00023(17)
S1 0.0227(5) 0.0335(6) 0.0235(5) -0.0009(4) 0.0042(4) -0.0011(4)
S2 0.0251(5) 0.0343(6) 0.0233(5) 0.0018(4) 0.0024(4) -0.0005(4)
S5 0.0223(5) 0.0347(6) 0.0246(5) 0.0038(4) 0.0024(4) 0.0016(4)
S3 0.0255(5) 0.0317(6) 0.0255(5) -0.0008(4) 0.0032(4) 0.0006(4)
S6 0.0281(5) 0.0313(5) 0.0216(5) 0.0001(4) 0.0047(4) 0.0020(4)
S4 0.0225(5) 0.0348(6) 0.0268(5) -0.0022(4) 0.0060(4) -0.0021(4)
N7 0.0265(17) 0.038(2) 0.0229(16) -0.0053(14) 0.0066(13) -0.0017(15)
N3 0.0229(16) 0.0331(19) 0.0242(16) -0.0048(14) 0.0004(13) 0.0008(14)
N5 0.0231(17) 0.042(2) 0.0220(16) 0.0025(14) 0.0024(13) 0.0072(15)
N4 0.0266(18) 0.039(2) 0.0320(18) -0.0056(15) 0.0082(14) -0.0077(15)
N8 0.0283(18) 0.038(2) 0.0354(19) -0.0075(16) 0.0056(15) 0.0049(16)
N1 0.0238(16) 0.039(2) 0.0222(16) -0.0056(14) 0.0025(13) 0.0000(14)
N10 0.0217(16) 0.041(2) 0.0240(16) -0.0004(14) 0.0055(13) -0.0028(15)
N9 0.0207(16) 0.0335(19) 0.0212(16) -0.0005(13) 0.0024(12) -0.0001(13)
N6 0.0295(19) 0.045(2) 0.038(2) 0.0167(17) 0.0020(15) 0.0001(16)
N11 0.0239(17) 0.041(2) 0.0188(15) 0.0021(14) 0.0032(13) -0.0014(14)
N2 0.0207(16) 0.037(2) 0.0312(18) -0.0056(15) 0.0025(14) 0.0002(14)
C21 0.0225(19) 0.036(2) 0.0243(19) 0.0062(17) 0.0025(15) -0.0004(17)
N12 0.037(2) 0.039(2) 0.0302(19) 0.0078(16) -0.0023(15) -0.0042(16)
C1 0.0238(19) 0.039(2) 0.0187(18) -0.0030(16) 0.0060(15) -0.0018(17)
C13 0.0221(19) 0.041(2) 0.0239(19) -0.0012(17) 0.0081(15) 0.0000(17)
C2 0.031(2) 0.039(3) 0.032(2) -0.0140(18) 0.0046(18) -0.0044(19)
C9 0.0212(19) 0.033(2) 0.031(2) 0.0064(17) 0.0024(16) 0.0041(16)
C4 0.025(2) 0.043(3) 0.051(3) -0.010(2) -0.0001(19) 0.0053(19)
C18 0.0196(19) 0.046(3) 0.027(2) -0.0037(18) -0.0009(15) -0.0006(18)
C6 0.022(2) 0.037(2) 0.031(2) -0.0067(17) 0.0007(16) 0.0008(17)
C14 0.036(2) 0.037(3) 0.033(2) -0.0122(18) 0.0039(18) -0.0044(19)
C10 0.031(2) 0.061(3) 0.026(2) 0.011(2) 0.0034(17) 0.014(2)
C3 0.033(2) 0.034(2) 0.045(3) -0.014(2) 0.0045(19) -0.0011(19)
B2 0.028(2) 0.041(3) 0.017(2) -0.0008(18) 0.0045(17) -0.002(2)
C22 0.036(2) 0.056(3) 0.0176(19) 0.0039(18) 0.0003(17) -0.007(2)
C17 0.0231(19) 0.029(2) 0.0238(18) -0.0003(15) 0.0056(15) -0.0025(16)
C23 0.054(3) 0.056(3) 0.021(2) 0.012(2) -0.0023(19) -0.014(2)
C8 0.037(2) 0.053(3) 0.030(2) -0.003(2) 0.0136(19) -0.011(2)
C16 0.031(2) 0.048(3) 0.052(3) -0.017(2) 0.004(2) 0.009(2)
C7 0.021(2) 0.040(3) 0.038(2) -0.0076(19) 0.0050(17) -0.0032(17)
B1 0.022(2) 0.041(3) 0.022(2) -0.0018(19) -0.0012(17) 0.0027(19)
C20 0.035(2) 0.049(3) 0.027(2) 0.0035(19) 0.0118(18) -0.001(2)
C11 0.035(2) 0.069(4) 0.033(2) 0.024(2) 0.0078(19) 0.005(2)
C19 0.0194(19) 0.050(3) 0.034(2) -0.0067(19) 0.0040(16) -0.0021(18)
C15 0.038(2) 0.039(3) 0.042(3) -0.013(2) 0.005(2) 0.001(2)
C5 0.0239(19) 0.032(2) 0.026(2) -0.0028(16) 0.0034(15) -0.0040(16)
C24 0.070(4) 0.039(3) 0.039(3) 0.008(2) -0.006(2) -0.013(2)
C12 0.046(3) 0.043(3) 0.062(3) 0.019(2) -0.007(2) -0.007(2)
 
 
#----------------------------------------------------------------------------#
#                   MOLECULAR GEOMETRY                                       #
#----------------------------------------------------------------------------#
 
_geom_special_details
;
 All esds (except the esd in the dihedral angle between two l.s. planes)
 are estimated using the full covariance matrix.  The cell esds are taken
 into account individually in the estimation of esds in distances, angles
 and torsion angles; correlations between esds in cell parameters are only
 used when they are defined by crystal symmetry.  An approximate (isotropic)
 treatment of cell esds is used for estimating esds involving l.s. planes.
;
loop_
    _geom_bond_atom_site_label_1
    _geom_bond_atom_site_label_2
    _geom_bond_distance
    _geom_bond_site_symmetry_2
    _geom_bond_publ_flag
F1 B3 1.365(6) . ?
F2 B3 1.387(6) . ?
B3 F4 1.376(6) . ?
B3 F3 1.391(6) . ?
O3 C29 1.336(14) . ?
O2 C25 1.51(3) . ?
O2 C28 1.55(3) . ?
C27 C28 0.76(3) 5_577 ?
C27 C28 1.56(3) . ?
C27 C26 1.43(3) . ?
C27 C27 1.91(5) 5_577 ?
C28 C27 0.76(3) 5_577 ?
C28 C28 1.55(5) 5_577 ?
C26 C25 1.85(3) . ?
Co1 S6 2.3043(11) . ?
Co1 S4 2.3114(10) . ?
Co1 S5 2.3117(11) . ?
Co1 S3 2.3168(11) . ?
Co1 S2 2.3256(11) . ?
Co1 S1 2.3268(10) . ?
S1 C1 1.727(4) . ?
S2 C5 1.723(4) . ?
S5 C17 1.730(4) . ?
S3 C9 1.718(4) . ?
S6 C21 1.727(4) . ?
S4 C13 1.729(4) . ?
N7 C13 1.353(5) . ?
N7 C14 1.382(5) . ?
N7 B2 1.553(6) . ?
N3 C5 1.354(5) . ?
N3 C6 1.388(5) . ?
N3 B1 1.545(6) . ?
N5 C9 1.353(5) . ?
N5 C10 1.391(5) . ?
N5 B1 1.541(6) . ?
N4 C7 1.366(5) . ?
N4 C5 1.365(5) . ?
N4 C8 1.461(5) . ?
N8 C13 1.348(5) . ?
N8 C15 1.376(6) . ?
N8 C16 1.455(5) . ?
N1 C1 1.352(5) . ?
N1 C2 1.390(5) . ?
N1 B1 1.550(6) . ?
N10 C17 1.351(5) . ?
N10 C19 1.381(5) . ?
N10 C20 1.459(5) . ?
N9 C17 1.351(5) . ?
N9 C18 1.381(5) . ?
N9 B2 1.557(5) . ?
N6 C9 1.367(5) . ?
N6 C11 1.380(6) . ?
N6 C12 1.461(6) . ?
N11 C21 1.350(5) . ?
N11 C22 1.385(5) . ?
N11 B2 1.536(6) . ?
N2 C1 1.350(5) . ?
N2 C3 1.380(5) . ?
N2 C4 1.464(5) . ?
C21 N12 1.350(5) . ?
N12 C23 1.380(5) . ?
N12 C24 1.457(6) . ?
C2 C3 1.347(6) . ?
C18 C19 1.342(6) . ?
C6 C7 1.347(6) . ?
C14 C15 1.344(6) . ?
C10 C11 1.346(7) . ?
C22 C23 1.331(7) . ?
 
loop_
    _geom_angle_atom_site_label_1
    _geom_angle_atom_site_label_2
    _geom_angle_atom_site_label_3
    _geom_angle
    _geom_angle_site_symmetry_1
    _geom_angle_site_symmetry_3
    _geom_angle_publ_flag
F1 B3 F4 110.6(4) . . ?
F1 B3 F2 108.9(5) . . ?
F4 B3 F2 108.5(4) . . ?
F1 B3 F3 109.3(4) . . ?
F4 B3 F3 111.2(5) . . ?
F2 B3 F3 108.2(4) . . ?
C25 O2 C28 118.4(16) . . ?
C28 C27 C28 75(3) 5_577 . ?
C28 C27 C26 169(4) 5_577 . ?
C28 C27 C26 108(2) . . ?
C28 C27 C27 52(3) 5_577 5_577 ?
C28 C27 C27 22.6(11) . 5_577 ?
C26 C27 C27 130(2) . 5_577 ?
C27 C28 C28 77(3) 5_577 5_577 ?
C27 C28 C27 105(3) 5_577 . ?
C28 C28 C27 28.4(11) 5_577 . ?
C27 C28 O2 151(4) 5_577 . ?
C28 C28 O2 129(3) 5_577 . ?
C27 C28 O2 101(2) . . ?
C27 C26 C25 109.5(18) . . ?
O2 C25 C26 86.6(15) . . ?
S6 Co1 S4 95.94(4) . . ?
S6 Co1 S5 95.73(4) . . ?
S4 Co1 S5 95.41(4) . . ?
S6 Co1 S3 179.51(4) . . ?
S4 Co1 S3 84.53(4) . . ?
S5 Co1 S3 84.35(4) . . ?
S6 Co1 S2 85.98(4) . . ?
S4 Co1 S2 84.61(4) . . ?
S5 Co1 S2 178.27(4) . . ?
S3 Co1 S2 93.93(4) . . ?
S6 Co1 S1 83.07(4) . . ?
S4 Co1 S1 178.92(4) . . ?
S5 Co1 S1 85.12(4) . . ?
S3 Co1 S1 96.46(4) . . ?
S2 Co1 S1 94.88(4) . . ?
C1 S1 Co1 107.37(13) . . ?
C5 S2 Co1 106.96(14) . . ?
C17 S5 Co1 107.81(14) . . ?
C9 S3 Co1 105.57(14) . . ?
C21 S6 Co1 107.51(14) . . ?
C13 S4 Co1 106.27(13) . . ?
C13 N7 C14 108.2(4) . . ?
C13 N7 B2 130.9(4) . . ?
C14 N7 B2 120.6(3) . . ?
C5 N3 C6 108.5(3) . . ?
C5 N3 B1 130.8(3) . . ?
C6 N3 B1 120.5(3) . . ?
C9 N5 C10 107.7(4) . . ?
C9 N5 B1 131.2(3) . . ?
C10 N5 B1 120.9(4) . . ?
C7 N4 C5 109.9(3) . . ?
C7 N4 C8 124.2(3) . . ?
C5 N4 C8 125.8(3) . . ?
C13 N8 C15 109.7(3) . . ?
C13 N8 C16 125.4(4) . . ?
C15 N8 C16 124.9(4) . . ?
C1 N1 C2 108.2(3) . . ?
C1 N1 B1 131.0(4) . . ?
C2 N1 B1 120.6(3) . . ?
C17 N10 C19 109.2(3) . . ?
C17 N10 C20 125.8(3) . . ?
C19 N10 C20 125.0(3) . . ?
C17 N9 C18 107.8(3) . . ?
C17 N9 B2 131.3(3) . . ?
C18 N9 B2 120.8(3) . . ?
C9 N6 C11 108.7(4) . . ?
C9 N6 C12 125.4(4) . . ?
C11 N6 C12 125.8(4) . . ?
C21 N11 C22 107.6(3) . . ?
C21 N11 B2 131.6(3) . . ?
C22 N11 B2 120.8(3) . . ?
C1 N2 C3 110.0(3) . . ?
C1 N2 C4 125.7(3) . . ?
C3 N2 C4 124.3(4) . . ?
N11 C21 N12 107.7(3) . . ?
N11 C21 S6 129.0(3) . . ?
N12 C21 S6 123.3(3) . . ?
C21 N12 C23 108.9(4) . . ?
C21 N12 C24 125.0(4) . . ?
C23 N12 C24 126.0(4) . . ?
N2 C1 N1 107.1(3) . . ?
N2 C1 S1 125.0(3) . . ?
N1 C1 S1 127.9(3) . . ?
N8 C13 N7 107.2(4) . . ?
N8 C13 S4 124.7(3) . . ?
N7 C13 S4 128.1(3) . . ?
C3 C2 N1 108.3(4) . . ?
N5 C9 N6 107.7(3) . . ?
N5 C9 S3 128.9(3) . . ?
N6 C9 S3 123.4(3) . . ?
C19 C18 N9 108.8(3) . . ?
C7 C6 N3 108.1(4) . . ?
C15 C14 N7 108.3(4) . . ?
C11 C10 N5 108.6(4) . . ?
C2 C3 N2 106.4(4) . . ?
N11 B2 N7 112.7(3) . . ?
N11 B2 N9 111.8(3) . . ?
N7 B2 N9 110.7(3) . . ?
C23 C22 N11 108.8(4) . . ?
N9 C17 N10 107.6(3) . . ?
N9 C17 S5 128.8(3) . . ?
N10 C17 S5 123.6(3) . . ?
C22 C23 N12 107.0(4) . . ?
C6 C7 N4 107.0(4) . . ?
N5 B1 N3 112.5(3) . . ?
N5 B1 N1 111.4(3) . . ?
N3 B1 N1 111.1(3) . . ?
C10 C11 N6 107.1(4) . . ?
C18 C19 N10 106.5(3) . . ?
C14 C15 N8 106.7(4) . . ?
N3 C5 N4 106.5(3) . . ?
N3 C5 S2 129.1(3) . . ?
N4 C5 S2 124.4(3) . . ?
 
#----END

#  CIF produced by WinGX routine CIF_UPDATE
#  Created on 2002-04-16 at 14:36:02
#  Using CIFtbx version 2.6.2 16 Jun 1998
 
#  Dictionary name : cif_core.dic
#  Dictionary vers : 2.2
#  Request file    : c:\wingx\files\archive.dat
#  CIF files read  : chrisd2 import dreduc struct
 
 
data_[Co(mtH)3I]I
 
_audit_creation_date            2002-04-16T14:36:02-00:00
_audit_creation_method         'WinGX routine CIF_UPDATE'
_audit_conform_dict_name        cif_core.dic
_audit_conform_dict_version     2.2
_audit_conform_dict_location    ftp://ftp.iucr.org/pub/cif_core.dic
_publ_requested_category        FM
 
#----------------------------------------------------------------------------#
#                   CHEMICAL INFORMATION                                     #
#----------------------------------------------------------------------------#
 
_chemical_name_systematic
;
 ?
;
_chemical_name_common                   '[Co(mtH)3I]I'
_chemical_formula_moiety                'C12 H18 Co1 I2 N6 S3'
_chemical_formula_sum                   'C12 H18 Co1 I2 N6 S3'
_chemical_formula_weight                655.23
_chemical_compound_source               'synthesis as described'
 
#----------------------------------------------------------------------------#
#                   UNIT CELL INFORMATION                                    #
#----------------------------------------------------------------------------#
 
_symmetry_cell_setting                  Orthorhombic
_symmetry_space_group_name_H-M          Pnac
_symmetry_space_group_name_Hall         '-P 2n 2ac'
_symmetry_Int_Tables_number             62
loop_
    _symmetry_equiv_pos_as_xyz
'x, y, z'
'-x, y+1/2, -z'
'-x+1/2, y, z+1/2'
'x+1/2, y+1/2, -z+1/2'
 
_cell_length_a                          11.302(5)
_cell_length_b                          16.167(5)
_cell_length_c                          11.902(5)
_cell_angle_alpha                       90.000
_cell_angle_beta                        90.000
_cell_angle_gamma                       90.000
_cell_volume                            2174.7(15)
_cell_formula_units_Z                   4
_cell_measurement_temperature           123(2)
_cell_measurement_reflns_used           4806
_cell_measurement_theta_min             2.91
_cell_measurement_theta_max             27.485
_cell_measurement_wavelength            0.71073
 
#----------------------------------------------------------------------------#
#                   CRYSTAL INFORMATION                                      #
#----------------------------------------------------------------------------#
 
_exptl_crystal_description              prism
_exptl_crystal_colour                   green
_exptl_crystal_size_max                 0.4
_exptl_crystal_size_mid                 0.2
_exptl_crystal_size_min                 0.2
_exptl_crystal_density_diffrn           2.001
_exptl_crystal_density_method           'not measured'
_exptl_crystal_F_000                    1252
_exptl_special_details
;
 ?
;
 
#----------------------------------------------------------------------------#
#                   ABSORPTION CORRECTION                                    #
#----------------------------------------------------------------------------#
 
_exptl_absorpt_coefficient_mu           3.924
_exptl_absorpt_correction_type          none
 
#----------------------------------------------------------------------------#
#                   DATA COLLECTION                                          #
#----------------------------------------------------------------------------#
 
_diffrn_source                          'Enraf Nonius FR590'
_diffrn_ambient_temperature             123(2)
_diffrn_radiation_wavelength            0.71069
_diffrn_radiation_type                  MoK\a
_diffrn_radiation_monochromator         graphite
_diffrn_radiation_probe                 x-ray
_diffrn_detector                        'CCD plate'
_diffrn_orient_matrix_type              'by Nonius Collect from scalepack cell'
_diffrn_orient_matrix_ub_11             -0.823251E-1
_diffrn_orient_matrix_ub_12             0.134418E-1
_diffrn_orient_matrix_ub_13             -0.248919E-1
_diffrn_orient_matrix_ub_21             0.303928E-1
_diffrn_orient_matrix_ub_22             0.493539E-1
_diffrn_orient_matrix_ub_23             -0.04158
_diffrn_orient_matrix_ub_31             0.113127E-1
_diffrn_orient_matrix_ub_32             -0.347754E-1
_diffrn_orient_matrix_ub_33             -0.686326E-1
_diffrn_measurement_device              '95mm CCD camera on \k-goniostat'
_diffrn_measurement_device_type         KappaCCD
_diffrn_measurement_method              'CCD; rotation images; thick slices'
_diffrn_reflns_av_R_equivalents         0.0275
_diffrn_reflns_av_unetI/netI            0.0315
_diffrn_reflns_number                   4596
_diffrn_reflns_limit_h_min              0
_diffrn_reflns_limit_h_max              14
_diffrn_reflns_limit_k_min              0
_diffrn_reflns_limit_k_max              20
_diffrn_reflns_limit_l_min              -15
_diffrn_reflns_limit_l_max              15
_diffrn_reflns_theta_min                3.42
_diffrn_reflns_theta_max                27.29
_diffrn_reflns_theta_full               27.29
_diffrn_measured_fraction_theta_full
                                        0.952
_diffrn_measured_fraction_theta_max
                                        0.952
_reflns_number_total                    2410
_reflns_number_gt                       2069
_reflns_threshold_expression            >2sigma(I)
 
#----------------------------------------------------------------------------#
#                   COMPUTER PROGRAMS USED                                   #
#----------------------------------------------------------------------------#
 
_computing_data_collection              'Collect (Nonius BV, 1997-2000)'
_computing_cell_refinement
                                       'HKL Scalepack (Otwinowski & Minor 1997)'
_computing_data_reduction
                             'HKL Denzo and Scalepack (Otwinowski & Minor 1997)'
_computing_structure_solution           'SHELXS-97 (Sheldrick, 1997)'
_computing_structure_refinement         'SHELXL-97 (Sheldrick, 1997)'
_computing_molecular_graphics           'Ortep-3 for Windows (Farrugia, 1997)'
_computing_publication_material
                                   'WinGX publication routines (Farrugia, 1999)'
 
#----------------------------------------------------------------------------#
#                   REFINEMENT INFORMATION                                   #
#----------------------------------------------------------------------------#
 
_refine_special_details
;
 Refinement of F^2^ against ALL reflections.  The weighted R-factor wR and
 goodness of fit S are based on F^2^, conventional R-factors R are based
 on F, with F set to zero for negative F^2^. The threshold expression of
 F^2^ > 2sigma(F^2^) is used only for calculating R-factors(gt) etc. and is
 not relevant to the choice of reflections for refinement.  R-factors based
 on F^2^ are statistically about twice as large as those based on F, and R-
 factors based on ALL data will be even larger.
;
_refine_ls_structure_factor_coef        Fsqd
_refine_ls_matrix_type                  full
_refine_ls_weighting_scheme             calc
_refine_ls_weighting_details
         'calc w=1/[\s^2^(Fo^2^)+(0.0360P)^2^+1.4812P] where P=(Fo^2^+2Fc^2^)/3'
_atom_sites_solution_primary            direct
_atom_sites_solution_secondary          difmap
_atom_sites_solution_hydrogens          geom
_refine_ls_hydrogen_treatment           mixed
_refine_ls_extinction_method            SHELXL
_refine_ls_extinction_expression
                                    Fc^*^=kFc[1+0.001xFc^2^\l^3^/sin(2\q)]^-1/4^
_refine_ls_extinction_coef              0.0103(11)
_refine_ls_number_reflns                2410
_refine_ls_number_parameters            222
_refine_ls_number_restraints            1
_refine_ls_R_factor_all                 0.0378
_refine_ls_R_factor_gt                  0.0293
_refine_ls_wR_factor_ref                0.0747
_refine_ls_wR_factor_gt                 0.0715
_refine_ls_goodness_of_fit_ref          1.061
_refine_ls_restrained_S_all             1.061
_refine_ls_shift/su_max                 0.034
_refine_ls_shift/su_mean                0.001
_refine_ls_abs_structure_details
                                    'Flack H D (1983), Acta Cryst. A39, 876-881'
_refine_ls_abs_structure_Flack          0.61(8)
_refine_diff_density_max                0.44
_refine_diff_density_min                -0.473
_refine_diff_density_rms                0.068
 
#----------------------------------------------------------------------------#
#                   ATOMIC TYPES, COORDINATES AND THERMAL PARAMETERS         #
#----------------------------------------------------------------------------#
 
loop_
    _atom_type_symbol
    _atom_type_description
    _atom_type_scat_dispersion_real
    _atom_type_scat_dispersion_imag
    _atom_type_scat_source
C C 0.0033 0.0016 'International Tables Vol C Tables 4.2.6.8 and 6.1.1.4'
H H 0 0 'International Tables Vol C Tables 4.2.6.8 and 6.1.1.4'
B B 0.0013 0.0007 'International Tables Vol C Tables 4.2.6.8 and 6.1.1.4'
N N 0.0061 0.0033 'International Tables Vol C Tables 4.2.6.8 and 6.1.1.4'
S S 0.1246 0.1234 'International Tables Vol C Tables 4.2.6.8 and 6.1.1.4'
Co Co 0.3494 0.9721 'International Tables Vol C Tables 4.2.6.8 and 6.1.1.4'
I I -0.4742 1.8119 'International Tables Vol C Tables 4.2.6.8 and 6.1.1.4'
 
loop_
    _atom_site_label
    _atom_site_type_symbol
    _atom_site_fract_x
    _atom_site_fract_y
    _atom_site_fract_z
    _atom_site_U_iso_or_equiv
    _atom_site_adp_type
    _atom_site_occupancy
    _atom_site_symmetry_multiplicity
    _atom_site_calc_flag
    _atom_site_refinement_flags
    _atom_site_disorder_assembly
    _atom_site_disorder_group
I1 I 0.50377(3) 0.81847(3) 0.97603(4) 0.04633(14) Uani 1 1 d . . .
I2 I 0.49849(4) 1.05269(4) 1.44329(5) 0.06597(18) Uani 1 1 d . . .
Co1 Co 0.50140(6) 0.95987(7) 1.26357(8) 0.0428(2) Uani 1 1 d . . .
S1 S 0.42508(13) 0.82951(14) 1.30553(11) 0.0469(4) Uani 1 1 d . . .
S2 S 0.69591(13) 0.94519(14) 1.20015(15) 0.0496(4) Uani 1 1 d . . .
S3 S 0.38358(14) 1.02010(15) 1.12497(13) 0.0490(4) Uani 1 1 d . . .
N2 N 0.5039(3) 0.8201(6) 1.5227(5) 0.0488(11) Uani 1 1 d . . .
C9 C 0.3063(5) 1.0949(4) 1.1964(5) 0.0420(13) Uani 1 1 d . . .
N4 N 0.7765(4) 1.0969(3) 1.2674(4) 0.0436(11) Uani 1 1 d . . .
N6 N 0.2201(5) 1.0856(3) 1.2690(5) 0.0485(12) Uani 1 1 d . . .
N3 N 0.8388(4) 0.9992(4) 1.3691(5) 0.0499(12) Uani 1 1 d . . .
H3 H 0.8511 0.9491 1.3956 0.06 Uiso 1 1 calc R . .
C5 C 0.7719(5) 1.0154(4) 1.2824(5) 0.0402(12) Uani 1 1 d . . .
C1 C 0.4149(4) 0.8294(4) 1.4482(4) 0.0389(11) Uani 1 1 d . . .
N1 N 0.3165(4) 0.8338(4) 1.5096(5) 0.0523(13) Uani 1 1 d . . .
H1 H 0.2446 0.839 1.4821 0.063 Uiso 1 1 calc R . .
C12 C 0.1720(7) 1.0059(5) 1.3085(8) 0.070(2) Uani 1 1 d . . .
H12A H 0.2373 0.968 1.3253 0.106 Uiso 1 1 calc R . .
H12B H 0.1217 0.9819 1.2499 0.106 Uiso 1 1 calc R . .
H12C H 0.125 1.015 1.3766 0.106 Uiso 1 1 calc R . .
C3 C 0.4583(7) 0.8203(6) 1.6314(5) 0.0628(16) Uani 1 1 d . . .
H3 H 0.5026 0.8149 1.6989 0.075 Uiso 1 1 calc R . .
C2 C 0.3439(6) 0.8290(5) 1.6238(6) 0.0653(18) Uani 1 1 d . . .
H2 H 0.2894 0.8316 1.6845 0.078 Uiso 1 1 calc R . .
C11 C 0.1807(6) 1.1613(5) 1.3075(7) 0.0587(18) Uani 1 1 d . . .
H11 H 0.1205 1.171 1.3617 0.07 Uiso 1 1 calc R . .
C4 C 0.6295(5) 0.8119(8) 1.4926(6) 0.072(2) Uani 1 1 d . . .
H4A H 0.6377 0.8125 1.4106 0.107 Uiso 1 1 calc R . .
H4B H 0.6602 0.7596 1.5222 0.107 Uiso 1 1 calc R . .
H4C H 0.6742 0.858 1.5249 0.107 Uiso 1 1 calc R . .
C10 C 0.2437(7) 1.2178(5) 1.2535(7) 0.0623(18) Uani 1 1 d . . .
H10 H 0.236 1.2761 1.2606 0.075 Uiso 1 1 calc R . .
C7 C 0.8464(5) 1.1318(5) 1.3485(5) 0.0491(14) Uani 1 1 d . . .
H7 H 0.863 1.189 1.3572 0.059 Uiso 1 1 calc R . .
C8 C 0.7143(7) 1.1427(5) 1.1800(7) 0.066(2) Uani 1 1 d . . .
H8A H 0.7361 1.1206 1.1062 0.099 Uiso 1 1 calc R . .
H8B H 0.7363 1.2013 1.1841 0.099 Uiso 1 1 calc R . .
H8C H 0.6288 1.137 1.1909 0.099 Uiso 1 1 calc R . .
N5 N 0.3225(5) 1.1765(4) 1.1852(5) 0.0534(14) Uani 1 1 d . . .
H5 H 0.3751 1.2001 1.1411 0.064 Uiso 1 1 calc R . .
C6 C 0.8876(5) 1.0697(5) 1.4140(6) 0.0540(16) Uani 1 1 d . . .
H6 H 0.9389 1.0739 1.4771 0.065 Uiso 1 1 calc R . .
 
loop_
    _atom_site_aniso_label
    _atom_site_aniso_U_11
    _atom_site_aniso_U_22
    _atom_site_aniso_U_33
    _atom_site_aniso_U_23
    _atom_site_aniso_U_13
    _atom_site_aniso_U_12
I1 0.0411(2) 0.0453(2) 0.0526(2) 0.00314(18) 0.00581(14) -0.00019(18)
I2 0.0662(3) 0.0678(4) 0.0639(3) -0.0144(3) -0.0004(2) -0.0019(2)
Co1 0.0336(4) 0.0425(4) 0.0524(5) 0.0073(4) 0.0004(3) -0.0017(3)
S1 0.0521(8) 0.0481(8) 0.0406(7) 0.0049(6) -0.0082(6) -0.0151(7)
S2 0.0380(7) 0.0395(7) 0.0712(10) -0.0093(7) 0.0042(8) -0.0023(6)
S3 0.0475(8) 0.0572(9) 0.0424(8) 0.0065(7) 0.0079(7) 0.0132(7)
N2 0.049(3) 0.058(3) 0.039(3) 0.001(2) 0.0000(18) 0.007(3)
C9 0.037(3) 0.044(3) 0.045(3) 0.004(3) -0.002(3) 0.008(2)
N4 0.043(3) 0.038(2) 0.050(3) 0.006(2) -0.009(2) -0.006(2)
N6 0.040(3) 0.042(3) 0.064(3) -0.007(2) 0.008(2) 0.004(2)
N3 0.040(3) 0.053(3) 0.057(3) 0.017(3) -0.001(2) 0.006(2)
C5 0.029(3) 0.042(3) 0.049(3) 0.007(3) 0.002(2) 0.001(2)
C1 0.037(2) 0.036(3) 0.043(3) 0.006(2) -0.001(2) 0.000(2)
N1 0.036(2) 0.066(4) 0.055(3) 0.007(3) 0.006(2) -0.001(2)
C12 0.066(4) 0.053(4) 0.093(6) -0.002(4) 0.038(4) -0.006(3)
C3 0.070(4) 0.079(5) 0.039(3) 0.005(4) 0.007(3) 0.007(5)
C2 0.071(4) 0.067(4) 0.057(4) -0.005(4) 0.028(3) 0.000(4)
C11 0.048(4) 0.064(4) 0.065(4) -0.020(4) 0.002(3) 0.012(3)
C4 0.041(3) 0.122(7) 0.051(3) 0.005(5) -0.004(3) 0.014(5)
C10 0.059(4) 0.046(3) 0.082(5) -0.005(3) -0.014(4) 0.012(3)
C7 0.047(3) 0.055(4) 0.045(3) -0.009(3) -0.007(3) -0.007(3)
C8 0.084(5) 0.045(4) 0.069(5) 0.012(4) -0.029(4) -0.011(4)
N5 0.053(3) 0.045(3) 0.062(3) 0.007(3) -0.007(3) -0.003(2)
C6 0.040(3) 0.075(4) 0.047(3) -0.003(3) -0.003(3) 0.004(3)
 
 
#----------------------------------------------------------------------------#
#                   MOLECULAR GEOMETRY                                       #
#----------------------------------------------------------------------------#
 
_geom_special_details
;
 All esds (except the esd in the dihedral angle between two l.s. planes)
 are estimated using the full covariance matrix.  The cell esds are taken
 into account individually in the estimation of esds in distances, angles
 and torsion angles; correlations between esds in cell parameters are only
 used when they are defined by crystal symmetry.  An approximate (isotropic)
 treatment of cell esds is used for estimating esds involving l.s. planes.
;
loop_
    _geom_bond_atom_site_label_1
    _geom_bond_atom_site_label_2
    _geom_bond_distance
    _geom_bond_site_symmetry_2
    _geom_bond_publ_flag
I2 Co1 2.6131(14) . ?
Co1 S1 2.331(3) . ?
Co1 S3 2.333(2) . ?
Co1 S2 2.3363(19) . ?
S1 C1 1.702(5) . ?
S2 C5 1.727(7) . ?
S3 C9 1.717(6) . ?
N2 C1 1.348(7) . ?
N2 C3 1.393(8) . ?
N2 C4 1.469(7) . ?
C9 N6 1.311(8) . ?
C9 N5 1.339(8) . ?
N4 C5 1.331(8) . ?
N4 C7 1.369(8) . ?
N4 C8 1.458(9) . ?
N6 C11 1.381(8) . ?
N6 C12 1.475(9) . ?
N3 C5 1.305(8) . ?
N3 C6 1.375(9) . ?
C1 N1 1.333(7) . ?
N1 C2 1.395(9) . ?
C3 C2 1.304(10) . ?
C11 C10 1.324(11) . ?
C10 N5 1.379(9) . ?
C7 C6 1.354(9) . ?
 
loop_
    _geom_angle_atom_site_label_1
    _geom_angle_atom_site_label_2
    _geom_angle_atom_site_label_3
    _geom_angle
    _geom_angle_site_symmetry_1
    _geom_angle_site_symmetry_3
    _geom_angle_publ_flag
S1 Co1 S3 108.52(8) . . ?
S1 Co1 S2 109.00(11) . . ?
S3 Co1 S2 110.55(8) . . ?
S1 Co1 I2 109.82(6) . . ?
S3 Co1 I2 109.39(8) . . ?
S2 Co1 I2 109.55(6) . . ?
C1 S1 Co1 103.9(2) . . ?
C5 S2 Co1 102.6(2) . . ?
C9 S3 Co1 103.6(2) . . ?
C1 N2 C3 109.5(5) . . ?
C1 N2 C4 124.8(5) . . ?
C3 N2 C4 125.7(6) . . ?
N6 C9 N5 106.2(5) . . ?
N6 C9 S3 128.6(5) . . ?
N5 C9 S3 125.1(5) . . ?
C5 N4 C7 109.7(5) . . ?
C5 N4 C8 125.4(6) . . ?
C7 N4 C8 124.9(6) . . ?
C9 N6 C11 110.9(6) . . ?
C9 N6 C12 125.7(5) . . ?
C11 N6 C12 123.3(6) . . ?
C5 N3 C6 112.0(5) . . ?
N3 C5 N4 106.4(5) . . ?
N3 C5 S2 127.2(5) . . ?
N4 C5 S2 126.5(5) . . ?
N1 C1 N2 105.6(5) . . ?
N1 C1 S1 127.1(4) . . ?
N2 C1 S1 127.3(4) . . ?
C1 N1 C2 110.2(5) . . ?
C2 C3 N2 107.6(6) . . ?
C3 C2 N1 107.1(5) . . ?
C10 C11 N6 106.1(6) . . ?
C11 C10 N5 107.4(6) . . ?
C6 C7 N4 107.4(6) . . ?
C9 N5 C10 109.3(6) . . ?
C7 C6 N3 104.6(5) . . ?
 
END
